# Supplementary material for: Impact of device landing zone calcification patterns on paravalvular regurgitation after transcatheter aortic valve replacement with different next-generation devices
Source: PubMed Central journal article supplement — Open Heart. 2020 May 10;7(1):e001164. doi: 10.1136/openhrt-2019-001164 (PMC7223472; doi:10.1136/openhrt-2019-001164), 2020-05-10
Supplement: openhrt-2019-001164supp002.pdf [file openhrt-2019-001164supp002.pdf]

**Supplementary Table 1: Device landing zone characteristics and degree of paravalvular regurgitation with different devices**

|                                             | Degree of PVR     |                   |                   |                  | $\tau$ |
|---------------------------------------------|-------------------|-------------------|-------------------|------------------|--------|
|                                             | none              | trace             | mild              | $\geq$ moderate  |        |
| <b>SAPIEN 3</b>                             | n=143             | n=70              | n=77              | n=2              |        |
| Area (mm <sup>2</sup> )                     | 503.7 $\pm$ 102.1 | 525.4 $\pm$ 113.1 | 506.6 $\pm$ 99.1  | 628.7            | 0,04   |
| Perimeter (mm)                              | 81.1 $\pm$ 8.1    | 82.6 $\pm$ 8.9    | 81.3 $\pm$ 7.9    | 92.1             | 0,04   |
| Area oversizing (%)                         | 8.0 $\pm$ 12.3    | 5.8 $\pm$ 12.1    | 4.8 $\pm$ 14.2    | -5.2             | -0,11  |
| Perimeter oversizing (%)                    | 1.2 $\pm$ 5.6     | 0.4 $\pm$ 5.6     | -0.3 $\pm$ 6.6    | -6.1             | -0,11  |
| AVC calcium volume (mm <sup>3</sup> )       | 617(381-1026)     | 671(467-1076)     | 805(455-1076)     | 2363             | 0,09   |
| NCC (mm <sup>3</sup> )                      | 258(156-476)      | 279(156-486)      | 362(205-469)      | 888              | 0,08   |
| RCC (mm <sup>3</sup> )                      | 191(96-314)       | 199(122-349)      | 200(123-350)      | 829              | 0,07   |
| LCC (mm <sup>3</sup> )                      | 144(84-307)       | 170(115-309)      | 214(107-350)      | 646              | 0,10   |
| LVOT calcium volume (mm <sup>3</sup> )      | 30(5-95)          | 19(2-113)         | 29(2-118)         | 413              | 0,00   |
| LVOT <sub>NC</sub> (mm <sup>3</sup> )       | 6(0-34)           | 4(0-24)           | 10(0-47)          | 136              | 0,02   |
| LVOT <sub>RC</sub> (mm <sup>3</sup> )       | 1(0-10)           | 0(0-7)            | 0(0-6)            | 49               | -0,07  |
| LVOT <sub>LC</sub> (mm <sup>3</sup> )       | 4(0-31)           | 4(0-41)           | 5(0-30)           | 228              | 0,03   |
| Total DLZ calcium volume (mm <sup>3</sup> ) | 695(438-1093)     | 735(488-1184)     | 868(573-1246)     | 2776             | 0,09   |
| AVC asymmetry                               | 206 $\pm$ 158     | 231 $\pm$ 182     | 197 $\pm$ 138     | 612              | 0,02   |
| LVOT asymmetry                              | 53 $\pm$ 87       | 43 $\pm$ 63       | 51 $\pm$ 78       | 218              | -0,01  |
| <b>ACURATE neo</b>                          | n=17              | n=33              | n=100             | n=16             |        |
| Area (mm <sup>2</sup> )                     | 418.2 $\pm$ 105.4 | 465.7 $\pm$ 109.2 | 456.9 $\pm$ 95.7  | 458.7 $\pm$ 89.4 | 0,07   |
| Perimeter (mm)                              | 74.5 $\pm$ 9.0    | 78.7 $\pm$ 8.1    | 76.8 $\pm$ 7.5    | 78.0 $\pm$ 7.2   | 0,05   |
| Area oversizing (%)                         | 14.1 $\pm$ 19.8   | 6.4 $\pm$ 20.0    | 6.4 $\pm$ 15.7    | 6.2 $\pm$ 19.7   | -0,05  |
| Perimeter oversizing (%)                    | 2.8 $\pm$ 8.7     | -1.0 $\pm$ 7.7    | 0.8 $\pm$ 7.0     | -0.6 $\pm$ 8.6   | -0,02  |
| AVC calcium volume (mm <sup>3</sup> )       | 514(186-803)      | 545(259-886)      | 591(418-811)      | 709(491-1389)    | 0,16   |
| NCC (mm <sup>3</sup> )                      | 196(80-358)       | 234(106-385)      | 246(154-356)      | 366(269-497)     | 0,17   |
| RCC (mm <sup>3</sup> )                      | 130(48-269)       | 133(77-244)       | 158(92-234)       | 207(97-546)      | 0,11   |
| LCC (mm <sup>3</sup> )                      | 93(47-211)        | 110(66-225)       | 148(86-261)       | 141(77-429)      | 0,14   |
| LVOT calcium volume (mm <sup>3</sup> )      | 5(1-30)           | 16(2-69)          | 19(5-90)          | 108(1-217)       | 0,14   |
| LVOT <sub>NC</sub> (mm <sup>3</sup> )       | 3(0-9)            | 1(0-17)           | 5(0-37)           | 29(1-141)        | 0,14   |
| LVOT <sub>RC</sub> (mm <sup>3</sup> )       | 0(0-9)            | 0(0-8)            | 0(0-8)            | 0(0-22)          | 0,01   |
| LVOT <sub>LC</sub> (mm <sup>3</sup> )       | 0(0-6)            | 4(0-18)           | 3(0-11)           | 7(0-131)         | 0,05   |
| Total DLZ calcium volume (mm <sup>3</sup> ) | 514(186-803)      | 545(259-886)      | 591(418-811)      | 709(491-1389)    | 0,17   |
| AVC asymmetry                               | 120 $\pm$ 108     | 159 $\pm$ 108     | 169 $\pm$ 126     | 268 $\pm$ 145    | 0,18   |
| LVOT asymmetry                              | 19 $\pm$ 33       | 43 $\pm$ 73       | 47 $\pm$ 79       | 127 $\pm$ 184    | 0,15   |
| <b>Evolut R</b>                             | n=34              | n=22              | n=63              | n=13             |        |
| Area (mm <sup>2</sup> )                     | 430.5 $\pm$ 79.9  | 449.2 $\pm$ 54.0  | 459.8 $\pm$ 101.2 | 471.5 $\pm$ 75.7 | 0,10   |
| Perimeter (mm)                              | 74.9 $\pm$ 7.0    | 76.7 $\pm$ 4.5    | 77.5 $\pm$ 8.2    | 78.3 $\pm$ 6.5   | 0,11   |
| Area oversizing (%)                         | 43.1 $\pm$ 19.2   | 37.4 $\pm$ 19.3   | 37.5 $\pm$ 23.0   | 35.4 $\pm$ 16.3  | -0,08  |
| Perimeter oversizing (%)                    | 16.8 $\pm$ 8.1    | 14.3 $\pm$ 8.2    | 14.0 $\pm$ 10.3   | 13.8 $\pm$ 6.5   | -0,08  |
| AVC calcium volume (mm <sup>3</sup> )       | 405(256-636)      | 627(473-863)      | 612(369-1019)     | 815(533-1412)    | 0,26   |
| NCC (mm <sup>3</sup> )                      | 201(106-252)      | 278(157-387)      | 295(184-445)      | 341(262-549)     | 0,26   |
| RCC (mm <sup>3</sup> )                      | 103(57-205)       | 185(126-305)      | 167(92-331)       | 285(123-507)     | 0,19   |
| LCC (mm <sup>3</sup> )                      | 90(58-164)        | 146(103-220)      | 151(96-333)       | 215(140-399)     | 0,24   |
| LVOT calcium volume (mm <sup>3</sup> )      | 10(1-71)          | 36(12-73)         | 34(3-183)         | 111(31-442)      | 0,18   |
| LVOT <sub>NC</sub> (mm <sup>3</sup> )       | 2(0-32)           | 11(2-29)          | 7(0-65)           | 28(1-142)        | 0,11   |
| LVOT <sub>RC</sub> (mm <sup>3</sup> )       | 0(0-4)            | 1(0-8)            | 2(0-22)           | 0(0-4)           | 0,13   |
| LVOT <sub>LC</sub> (mm <sup>3</sup> )       | 2(0-10)           | 9(0-31)           | 2(0-73)           | 70(10-128)       | 0,17   |
| Total DLZ calcium volume (mm <sup>3</sup> ) | 443(262-638)      | 650(475-811)      | 591(410-1192)     | 1260(585-17489)  | 0,28   |
| AVC asymmetry                               | 126 $\pm$ 79      | 200 $\pm$ 100     | 210 $\pm$ 161     | 190 $\pm$ 100    | 0,18   |
| LVOT asymmetry                              | 39 $\pm$ 60       | 41 $\pm$ 54       | 83 $\pm$ 132      | 149 $\pm$ 168    | 0,17   |
| <b>Lotus</b>                                | n=31              | n=8               | n=13              |                  |        |
| Area (mm <sup>2</sup> )                     | 467.3 $\pm$ 76.0  | 443.6 $\pm$ 82.4  | 471.7 $\pm$ 93.1  | n/a              | 0,00   |
| Perimeter (mm)                              | 77.8 $\pm$ 6.3    | 76.1 $\pm$ 6.8    | 77.9 $\pm$ 7.7    | n/a              | -0,01  |
| Area oversizing (%)                         | 7.5 $\pm$ 10.7    | 10.2 $\pm$ 11.0   | 8.7 $\pm$ 10.7    | n/a              | 0,06   |
| Perimeter oversizing (%)                    | 1.7 $\pm$ 4.7     | 2.5 $\pm$ 4.7     | 2.5 $\pm$ 4.9     | n/a              | 0,05   |
| AVC calcium volume (mm <sup>3</sup> )       | 750(388-982)      | 641(294-1242)     | 686(266-1061)     | n/a              | 0,08   |
| NCC (mm <sup>3</sup> )                      | 302(136-497)      | 321(102-516)      | 380(210-552)      | n/a              | 0,08   |

|                                             |               |               |               |     |       |
|---------------------------------------------|---------------|---------------|---------------|-----|-------|
| RCC (mm <sup>3</sup> )                      | 186(77-344)   | 243(79-343)   | 167(96-384)   | n/a | 0,01  |
| LCC (mm <sup>3</sup> )                      | 172(85-270)   | 127(45-216)   | 161(124-257)  | n/a | -0,01 |
| LVOT calcium volume (mm <sup>3</sup> )      | 46(3-187)     | 15(0-195)     | 20(2-98)      | n/a | -0,08 |
| LVOT <sub>NC</sub> (mm <sup>3</sup> )       | 7(0-52)       | 10(0-155)     | 8(0-42)       | n/a | -0,03 |
| LVOT <sub>RC</sub> (mm <sup>3</sup> )       | 0(0-15)       | 1(0-6)        | 0(0-5)        | n/a | -0,01 |
| LVOT <sub>LC</sub> (mm <sup>3</sup> )       | 10(0-83)      | 1(0-68)       | 0(0-54)       | n/a | -0,13 |
| Total DLZ calcium volume (mm <sup>3</sup> ) | 772(416-1275) | 711(296-1638) | 914(618-1114) | n/a | 0,04  |
| AVC asymmetry                               | 209±207       | 269±290       | 322±225       | n/a | 0,22  |
| LVOT asymmetry                              | 69±84         | 63±85         | 48±72         | n/a | -0,06 |

Values are mean±SD or median (IQR)
