# Supplementary figures and images for: Impact of device landing zone calcification patterns on paravalvular regurgitation after transcatheter aortic valve replacement with different next-generation devices
Source: PubMed Central journal article supplement — Open Heart. 2020 May 10;7(1):e001164. doi: 10.1136/openhrt-2019-001164 (PMC7223472; doi:10.1136/openhrt-2019-001164), 2020-05-10

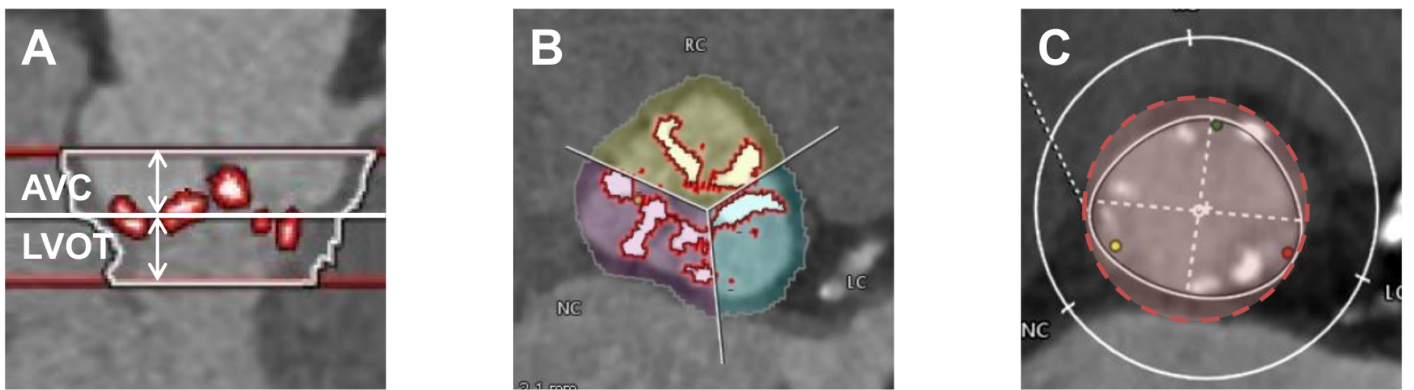

Supplement: openhrt-2019-001164supp001.pdf [file openhrt-2019-001164supp001.pdf]
